# Supplementary material
Source: PubMed Central journal article supplement (PMC9308716)
Supplement: NIHMS1809353-supplement-319582_Major_Resources_Table.pdf [file NIHMS1809353-supplement-319582_Major_Resources_Table.pdf]

## Major Resources Table

In order to allow validation and replication of experiments, all essential research materials listed in the Methods should be included in the Major Resources Table below. Authors are encouraged to use public repositories for protocols, data, code, and other materials and provide persistent identifiers and/or links to repositories when available. Authors may add or delete rows as needed.

### Animals (in vivo studies)

| Species                                                                           | Vendor or Source     | Background Strain | Sex           | Persistent ID / URL  |
|-----------------------------------------------------------------------------------|----------------------|-------------------|---------------|----------------------|
| Mice: <i>eNOSKO</i><br>B6.129P2- <i>Nos3<sup>tm1Unc</sup>/J</i>                   | Jackson Laboratories | Strain #:002684   | Female & Male | RRID:IMSR_JAX:002684 |
| Mice: C57BL/6-Tg( <i>Pdgfra-cre</i> )1Clc/J                                       | Jackson Laboratories | Strain #:013148   | Female & Male | RRID:IMSR_JAX:013148 |
| Mice:<br>B6.129(Cg)- <i>Gt(ROSA)26Sor<sup>tm4</sup>(ACTB-tdTomato,-EGFP)Luo/J</i> | Jackson Laboratories | Strain #:007676   | Female & Male | RRID:IMSR_JAX:007676 |
| Mice: <i>ApoE<sup>-/-</sup></i><br>B6.129P2- <i>ApoE<sup>tm1Unc</sup>/J</i>       | Jackson Laboratories | Strain #:002052   | Female & Male | RRID:IMSR_JAX:002052 |
| Mice: <i>ETBRKO</i><br>B6;129- <i>Ednrb<sup>tm1.1Nat</sup>/J</i>                  | Jackson Laboratories | Strain #:011080   | Female & Male | RRID:IMSR_JAX:011080 |
| Mice: VEC-Cre<br>B6.Cg-Tg( <i>Cdh5-cre</i> )1Spe/J                                | Jackson Laboratories | Strain #:033055   | Female & Male | RRID:IMSR_JAX:033055 |

### Genetically Modified Animals

| Species                       | Vendor or Source                 | Background Strain | Other Information                                        | Sex           | Persistent ID / URL |
|-------------------------------|----------------------------------|-------------------|----------------------------------------------------------|---------------|---------------------|
| <i>ECIRS1</i> transgenic mice | In house, Joslin Diabetes Center | C57BL/6J          | Human IRS1 overexpression driven by <i>Cdh5</i> promoter | Female & Male | N/A                 |

### Antibodies

| Target antigen | Vendor or Source | Catalog # | Working concentration | Lot # (preferred but not required) | Persistent ID / URL |
|----------------|------------------|-----------|-----------------------|------------------------------------|---------------------|
|                |                  |           |                       |                                    |                     |

|                              |                           |          |                                |  |                                                                                                                                                                                                                                                                                                 |
|------------------------------|---------------------------|----------|--------------------------------|--|-------------------------------------------------------------------------------------------------------------------------------------------------------------------------------------------------------------------------------------------------------------------------------------------------|
| p-CaMKII (Tyr231)            | Cell Signaling Technology | 3356     | 1:1,000 (WB)                   |  | <a href="https://www.cellsignal.com/products/primary-antibodies/phospho-camkii-tyr231-antibody/3356">https://www.cellsignal.com/products/primary-antibodies/phospho-camkii-tyr231-antibody/3356</a>                                                                                             |
| t-CaMKII                     | Cell Signaling Technology | 4436     | 1:1,000 (WB)                   |  | <a href="https://www.cellsignal.com/product/productDetail.jsp?productId=4436">https://www.cellsignal.com/product/productDetail.jsp?productId=4436</a>                                                                                                                                           |
| p-Erk                        | Cell Signaling Technology | 9101     | 1:1,000 (WB)                   |  | <a href="https://www.cellsignal.com/product/productDetail.jsp?productId=9101">https://www.cellsignal.com/product/productDetail.jsp?productId=9101</a>                                                                                                                                           |
| t-Erk                        | Cell Signaling Technology | 4695     | 1:1,000 (WB)                   |  | <a href="https://www.cellsignal.com/product/productDetail.jsp?productId=4695">https://www.cellsignal.com/product/productDetail.jsp?productId=4695</a>                                                                                                                                           |
| p-Akt                        | Cell Signaling Technology | 4060     | 1:1,000 (WB)                   |  | PRID:AB_10805010,<br><a href="https://www.cellsignal.com/product/productDetail.jsp?productId=4060">https://www.cellsignal.com/product/productDetail.jsp?productId=4060</a>                                                                                                                      |
| t-Akt                        | Cell Signaling Technology | 9272     | 1:1,000 (WB)                   |  | <a href="https://www.cellsignal.com/product/productDetail.jsp?productId=9272">https://www.cellsignal.com/product/productDetail.jsp?productId=9272</a>                                                                                                                                           |
| p-GSK3 $\beta$ (Ser21/9)     | Cell Signaling Technology | 9331     | 1:1,000 (WB)                   |  | <a href="https://www.cellsignal.com/product/productDetail.jsp?productId=9331">https://www.cellsignal.com/product/productDetail.jsp?productId=9331</a>                                                                                                                                           |
| p- $\beta$ -catenin (Ser675) | Cell Signaling Technology | 4176     | 1:1,000 (WB)                   |  | <a href="https://www.cellsignal.com/product/productDetail.jsp?productId=4176">https://www.cellsignal.com/product/productDetail.jsp?productId=4176</a>                                                                                                                                           |
| t- $\beta$ -catenin          | Cell Signaling Technology | 9582     | 1:1,000 (WB)                   |  | <a href="https://www.cellsignal.com/product/productDetail.jsp?productId=9582">https://www.cellsignal.com/product/productDetail.jsp?productId=9582</a>                                                                                                                                           |
| iNOS                         | Cell Signaling Technology | 2982     | 1:1,000 (WB)                   |  | PRID:AB_1078202,<br><a href="https://www.cellsignal.com/product/productDetail.jsp?productId=2982">https://www.cellsignal.com/product/productDetail.jsp?productId=2982</a>                                                                                                                       |
| t-PKG1 $\alpha$              | Cell Signaling Technology | 3248     | 1:1,000 (WB)                   |  | <a href="https://www.cellsignal.com/product/productDetail.jsp?productId=3248">https://www.cellsignal.com/product/productDetail.jsp?productId=3248</a>                                                                                                                                           |
| VCAM-1                       | R&D systems               | AF643    | 1:1,000 (WB & Neutralization ) |  | <a href="https://www.rndsystems.com/products/mouse-vcam-1-cd106-antibody_af643">https://www.rndsystems.com/products/mouse-vcam-1-cd106-antibody_af643</a>                                                                                                                                       |
| Galectin-3                   | Millipore Sigma           | MABT51   | 1:1,000 (IF)                   |  | <a href="https://www.emdmillipore.com/US/en/product/Anti-Galectin-3-Antibody-clone-M3-38,MM_NF-MABT51?ReferrerURL=https%3A%2F%2Fwww.google.com%2F">https://www.emdmillipore.com/US/en/product/Anti-Galectin-3-Antibody-clone-M3-38,MM_NF-MABT51?ReferrerURL=https%3A%2F%2Fwww.google.com%2F</a> |
| perilipin                    | Abcam                     | ab3526   | 1:1,000 (WB)                   |  | <a href="https://www.abcam.com/perilipin-1-antibody-ab3526.html">https://www.abcam.com/perilipin-1-antibody-ab3526.html</a>                                                                                                                                                                     |
| ICAM-1                       | Abcam                     | ab179707 | 1:1,000 (WB)                   |  | <a href="https://www.abcam.com/icam1-antibody-epr16608-ab179707.html">https://www.abcam.com/icam1-antibody-epr16608-ab179707.html</a>                                                                                                                                                           |
| UCP1                         | Abcam                     | ab23841  | 1:1,000(WB and IHC)            |  | <a href="https://www.abcam.com/ucp1-antibody-ab23841.html">https://www.abcam.com/ucp1-antibody-ab23841.html</a>                                                                                                                                                                                 |
| p-GSK3 $\beta$ (Y216/Y279)   | Abcam                     | ab68476  | 1:1,000 (WB)                   |  | <a href="https://www.abcam.com/gsk3-beta-phospho-y216--gsk3-alpha-phospho-y279-antibody-epr933y-ab68476.html">https://www.abcam.com/gsk3-beta-phospho-y216--gsk3-alpha-phospho-y279-antibody-epr933y-ab68476.html</a>                                                                           |

|                                          |                          |          |              |  |                                                                                                                                                                                                                 |
|------------------------------------------|--------------------------|----------|--------------|--|-----------------------------------------------------------------------------------------------------------------------------------------------------------------------------------------------------------------|
| total OXPHOS Rodent WB Antibody Cocktail | Abcam                    | ab110413 | 1:500 (WB)   |  | <a href="https://www.abcam.com/total-oxphos-rodent-wb-antibody-cocktail-ab110413.html">https://www.abcam.com/total-oxphos-rodent-wb-antibody-cocktail-ab110413.html</a>                                         |
| p-eNOS                                   | BD Biosciences           | 612392   | 1:1,000 (WB) |  | <a href="https://www.bdbiosciences.com/en-us/search-results?searchKey=612392">https://www.bdbiosciences.com/en-us/search-results?searchKey=612392</a>                                                           |
| t-eNOS                                   | BD Biosciences           | 610297   | 1:1,000 (WB) |  | <a href="https://www.bdbiosciences.com/en-us/search-results?searchKey=610297">https://www.bdbiosciences.com/en-us/search-results?searchKey=610297</a>                                                           |
| HDAC1                                    | Santa Cruz Biotechnology | sc-81598 | 1:1,000 (WB) |  | PRID:AB_2118083,<br><a href="https://www.scbt.com/p/hdac1-antibody-10e2?requestFrom=search">https://www.scbt.com/p/hdac1-antibody-10e2?requestFrom=search</a>                                                   |
| goat anti-mouse HRP                      | Santa Cruz Biotechnology | sc-2031  | 1:2,500 (WB) |  | <a href="https://www.scbt.com/p/goat-anti-mouse-igg-hrp-cruz-marker-compatible">https://www.scbt.com/p/goat-anti-mouse-igg-hrp-cruz-marker-compatible</a>                                                       |
| Goat anti-rabbit HRP                     | Santa Cruz Biotechnology | sc-2004  | 1:2,500 (WB) |  | <a href="https://www.scbt.com/p/goat-anti-rabbit-igg-hrp?requestFrom=search">https://www.scbt.com/p/goat-anti-rabbit-igg-hrp?requestFrom=search</a>                                                             |
| anti-mouse lineage-biotin (Lin-1)        | BioLegend                | 133307   | 1:500 (FACS) |  | <a href="https://www.biolegend.com/de-at/search-results/biotin-anti-mouse-lineage-panel-7611">https://www.biolegend.com/de-at/search-results/biotin-anti-mouse-lineage-panel-7611</a>                           |
| anti-mouse CD146-PerCP-Cy5.5             | BioLegend                | 134710   | 1:500 (FACS) |  | <a href="https://www.biolegend.com/en-us/products/percp-cyanine5-5-anti-mouse-cd146-antibody-7872">https://www.biolegend.com/en-us/products/percp-cyanine5-5-anti-mouse-cd146-antibody-7872</a>                 |
| anti-mouse PE/Cy7-CD31                   | BioLegend                | 102418   | 1:500 (FACS) |  | <a href="https://www.biolegend.com/en-us/products/pe-cyanine7-anti-mouse-cd31-antibody-3942">https://www.biolegend.com/en-us/products/pe-cyanine7-anti-mouse-cd31-antibody-3942</a>                             |
| anti-mouse PE-CD140b                     | BioLegend                | 136006   | 1:500 (FACS) |  | <a href="https://www.biolegend.com/en-us/products/pe-anti-mouse-cd140b-antibody-6256">https://www.biolegend.com/en-us/products/pe-anti-mouse-cd140b-antibody-6256</a>                                           |
| anti-mouse Pacific-Ly-6A/E (Sca-1)       | BioLegend                | 108120   | 1:500 (FACS) |  | <a href="https://www.biolegend.com/en-us/products/pacific-blue-anti-mouse-ly-6a-e-sca-1-antibody-3140">https://www.biolegend.com/en-us/products/pacific-blue-anti-mouse-ly-6a-e-sca-1-antibody-3140</a>         |
| anti-mouse Alexa Fluor 647-CD34          | BioLegend                | 119314   | 1:500 (FACS) |  | <a href="https://www.biolegend.com/en-us/products/alexa-fluor-647-anti-mouse-cd34-antibody-3773">https://www.biolegend.com/en-us/products/alexa-fluor-647-anti-mouse-cd34-antibody-3773</a>                     |
| anti-mouse Ter-119-Biotin                | BioLegend                | 116204   | 1:500 (FACS) |  | <a href="https://www.biolegend.com/en-us/products/biotin-anti-mouse-ter-119-erythroid-cells-antibody-1864">https://www.biolegend.com/en-us/products/biotin-anti-mouse-ter-119-erythroid-cells-antibody-1864</a> |

|                          |                |        |                    |  |                                                                                                                                                                                                                 |
|--------------------------|----------------|--------|--------------------|--|-----------------------------------------------------------------------------------------------------------------------------------------------------------------------------------------------------------------|
| anti-mouse NK-1.1-Biotin | BioLegend      | 108704 | 1:500 (FACS)       |  | <a href="https://www.biolegend.com/en-us/products/biotin-anti-mouse-nk-1-1-antibody-428">https://www.biolegend.com/en-us/products/biotin-anti-mouse-nk-1-1-antibody-428</a>                                     |
| anti-mouse CD11b-Biotin  | BioLegend      | 101204 | 1:500 (FACS)       |  | <a href="https://www.biolegend.com/en-us/products/biotin-anti-mouse-human-cd11b-antibody-346">https://www.biolegend.com/en-us/products/biotin-anti-mouse-human-cd11b-antibody-346</a>                           |
| anti-mouse Gr-1-Biotin   | BioLegend      | 108403 | 1:500 (FACS)       |  | <a href="https://www.biolegend.com/en-us/products/biotin-anti-mouse-ly-6g-ly-6c-gr-1-antibody-457">https://www.biolegend.com/en-us/products/biotin-anti-mouse-ly-6g-ly-6c-gr-1-antibody-457</a>                 |
| anti-mouse B20-Biotin    | BioLegend      | 103204 | 1:500 (FACS)       |  | <a href="https://www.biolegend.com/en-us/products/biotin-anti-mouse-human-cd45r-b220-antibody-444">https://www.biolegend.com/en-us/products/biotin-anti-mouse-human-cd45r-b220-antibody-444</a>                 |
| anti-mouse CD19-Biotin   | BioLegend      | 115504 | 1:500 (FACS)       |  | <a href="https://www.biolegend.com/en-us/products/biotin-anti-mouse-cd19-antibody-1527">https://www.biolegend.com/en-us/products/biotin-anti-mouse-cd19-antibody-1527</a>                                       |
| anti-mouse CD8a-Biotin   | BioLegend      | 100704 | 1:500 (FACS)       |  | <a href="https://www.biolegend.com/en-us/products/biotin-anti-mouse-cd8a-antibody-152">https://www.biolegend.com/en-us/products/biotin-anti-mouse-cd8a-antibody-152</a>                                         |
| anti-mouse CD4-Biotin    | BioLegend      | 116010 | 1:500 (FACS)       |  | <a href="https://www.biolegend.com/en-us/products/biotin-anti-mouse-cd4-antibody-8121">https://www.biolegend.com/en-us/products/biotin-anti-mouse-cd4-antibody-8121</a>                                         |
| anti-mouse CD3-Biotin    | BioLegend      | 100243 | 1:500 (FACS)       |  | <a href="https://www.biolegend.com/en-us/products/biotin-anti-mouse-cd3-antibody-10023">https://www.biolegend.com/en-us/products/biotin-anti-mouse-cd3-antibody-10023</a>                                       |
| ICAM2 (CD102)            | BD Biosciences | 553326 | (Isolation of ECs) |  | <a href="https://www.fishersci.com/shop/products/anti-cd102-clone-3c4-mic2-4-bd-0-5mg-unlabeled/bdb553326">https://www.fishersci.com/shop/products/anti-cd102-clone-3c4-mic2-4-bd-0-5mg-unlabeled/bdb553326</a> |
|                          |                |        |                    |  |                                                                                                                                                                                                                 |

### Cultured Cells

| Name                            | Vendor or Source                                              | Sex (F, M, or unknown) | Persistent ID / URL |
|---------------------------------|---------------------------------------------------------------|------------------------|---------------------|
| Bovine aortic endothelial cells | Bovine aorta (isolated in the lab)                            | Female & Male          | N/A                 |
| Mouse lung endothelial cells    | Mouse lung (isolated in the lab)                              | Female & Male          | N/A                 |
| Perivascular progenitor cells   | Mouse subcutaneous white adipose tissue (isolated in the lab) | Female & Male          | N/A                 |

## Oligonucleotides

| Gene ID               | siRNA target sequence (5'→3')                         | Use                | Source                      |
|-----------------------|-------------------------------------------------------|--------------------|-----------------------------|
| <b><i>PKG1α-1</i></b> | F: GGAUUGACAUGAUAGAAUUUCCAAA                          | siRNA transfection | Integrated DNA Technologies |
|                       | R: UUUGGAAAUUCTAUCAUGTCAAUCCCC                        |                    |                             |
| <b><i>PKG1α-2</i></b> | F: GACAUGAUAGAAUUUCCAAAGAAA                           | siRNA transfection | Integrated DNA Technologies |
|                       | R: UCUUCUUUGGAAAUUCUAUCAUGUCA                         |                    |                             |
| <b><i>PKG1α-3</i></b> | F: AUGAUAGAAUUUCCAAAGAAGAUTG                          | siRNA transfection | Integrated DNA Technologies |
|                       | R: CAAUCUUCUUUGGAAAUUCUAUCAUGU                        |                    |                             |
| <b><i>Mcad</i></b>    | F: ACTGACGCCGTTTCAGATTTT<br>R: GCTTAGTTACACGAGGGTGATG | qRT-PCR            | Integrated DNA Technologies |
| <b><i>Lcad</i></b>    | F: ATGGCAAATACTGGGCATC<br>R: TCTTGCGATCAGCTCTTTCA     | qRT-PCR            | Integrated DNA Technologies |
| <b><i>Ppara</i></b>   | F: GAGAATCCACGAAGCCTACC<br>R: AATCGGACCTCTGCCTCTTT    | qRT-PCR            | Integrated DNA Technologies |
| <b><i>Pgc1a</i></b>   | F: GTAAATCTGCGGGATGATGG<br>R: AGCAGGGTCAAATCGTCTG     | qRT-PCR            | Integrated DNA Technologies |
| <b><i>Hdha</i></b>    | F: TCAGGAGGGCTCAAAGAATAA<br>R: GAAAGCCAAGCCCAAAGAC    | qRT-PCR            | Integrated DNA Technologies |
| <b><i>Hdhb</i></b>    | F: GCCAACAGACTGAGGAAGGA<br>R: AACTGGCAAGGCTGGATT      | qRT-PCR            | Integrated DNA Technologies |
| <b><i>Cd36</i></b>    | F: CCATTGGTGATGAAAAAGCA<br>R: GATCGGCTTTACCAAAGATGTAG | qRT-PCR            | Integrated DNA Technologies |

|                      |                                                     |         |                             |
|----------------------|-----------------------------------------------------|---------|-----------------------------|
| <b><i>Etf</i></b>    | F: TGACAAAAAGTGACCCACCA<br>R: GAACAAAGCCAGCATCAACA  | qRT-PCR | Integrated DNA Technologies |
| <b><i>Etfb</i></b>   | F: GGTAAGAGTGGAACGGGAAA<br>R: TCTCCACCTTGACTCCTGCT  | qRT-PCR | Integrated DNA Technologies |
| <b><i>Etfq</i></b>   | F: CCTCTGTGGCTTTGAGTGGT<br>R: TCGAAATCCATCACCTTGTTT | qRT-PCR | Integrated DNA Technologies |
| <b><i>Cox4i1</i></b> | F: CGCTGAAGGAGAAGGAGAAG<br>R: GCAGTGAAGCCAATGAAGAA  | qRT-PCR | Integrated DNA Technologies |
| <b><i>Uqcrc1</i></b> | F: TGCCAGAGTTTCCAGACCTT<br>R: CCAAATGAGACACCAAAGCA  | qRT-PCR | Integrated DNA Technologies |
| <b><i>Ndufv1</i></b> | F: TGTGAGACCGTGCTAATGGA<br>R: CATCTCCCTTCACAAATCGG  | qRT-PCR | Integrated DNA Technologies |
| <b><i>Ndufa9</i></b> | F: ATCCCTTACCCTTTGCCACT<br>R: CCGTAGCACCTCAATGGACT  | qRT-PCR | Integrated DNA Technologies |
| <b><i>Tfam</i></b>   | F: CAAAAAGACCTCGTTCAGCA<br>R: CTTCAGCCATCTGCTCTTCC  | qRT-PCR | Integrated DNA Technologies |
| <b><i>Nrf1</i></b>   | F: CTTCAGAACTGCCAACCACA<br>R: GCTTCTGCCAGTGATGCTAC  | qRT-PCR | Integrated DNA Technologies |
| <b><i>Ucp1</i></b>   | F: CTGCCAGGACAGTACCCAAG<br>R: TCAGCTGTTCAAAGCACACA  | qRT-PCR | Integrated DNA Technologies |
| <b><i>18S</i></b>    | F: GTAACCCGTTGAACCCATT<br>R: CCATCCAATCGGTAGTAGCG   | qRT-PCR | Integrated DNA Technologies |
| <b><i>Vegfa</i></b>  | F: GGCAGCTTGAGTTAAACGAAC                            | qRT-PCR | Integrated DNA Technologies |

---

|                                 |                                                                                 |         |                             |
|---------------------------------|---------------------------------------------------------------------------------|---------|-----------------------------|
|                                 | R: TGGTGACATGGTTAATCGGTC                                                        |         |                             |
| <b>FOXA2</b>                    | F: CCGACTGGAGCAGCTACTATG<br>R: TACGTGTTTCATGCCGTTTCAT                           | qRT-PCR | Integrated DNA Technologies |
| <b>C/EBP<math>\alpha</math></b> | F: AAACAACGCAACGTGGAGAC                                                         | qRT-PCR | Integrated DNA Technologies |
| <b>C/EBP<math>\beta</math></b>  | R: TGTCCAGTTCACGGCTCAG<br>F: GGGTTGTTGATGTTTTTGTTT<br>R: GAAACGGAAAAGGTTCTCAAAA | qRT-PCR | Integrated DNA Technologies |
| <b>Creb</b>                     | F: TGCCAACTCCAATTTACCAA<br>R: ACCCCATCGGTACCATTGTT                              | qRT-PCR | Integrated DNA Technologies |
| <b>Mfn1</b>                     | F: CATTGCGTTTCGGTTTTTCCC<br>R: GAAGGAGCAGTAGGAGTTGAAG                           | qRT-PCR | Integrated DNA Technologies |
| <b>Mfn2</b>                     | F: TGAATGCTTCCCCTCTCAAG<br>R: TCCAGTTCTGTGTTCCCTGTG                             | qRT-PCR | Integrated DNA Technologies |
| <b>Opa1</b>                     | F: GTGTGCTGGAAATGATTGCTC<br>R: TGGTGAGATCAAATCCCGAG                             | qRT-PCR | Integrated DNA Technologies |
| <b>Ephx1</b>                    | F: GAGTGGAGGAACTGCACACC<br>R: GAAGCCAGGATGAGTTCCAG                              | qRT-PCR | Integrated DNA Technologies |
| <b>Ephx2</b>                    | F: GTTCGACCTTGACGGAGTG<br>R: GCACCAAGCAGGAAGTCTCT                               | qRT-PCR | Integrated DNA Technologies |
| <b>Cidea</b>                    | F: GAATAGCCAGAGTCACCTTCG<br>R: AGCAGATTCCCTTAACACGGC                            | qRT-PCR | Integrated DNA Technologies |
| <b>Adipsin</b>                  | F: CCATTGTTGAATTCTCCTCCA<br>R: TTCCACTCTCTTGGGTTTCCTT                           | qRT-PCR | Integrated DNA Technologies |

---

## ARRIVE GUIDELINES

The ARRIVE guidelines (<https://arriveguidelines.org/>) are a checklist of recommendations to improve the reporting of research involving animals. Key elements of the study design should be included below to better enable readers to scrutinize the research adequately, evaluate its methodological rigor, and reproduce the methods or findings.

### Study Design

| Groups                                  | Sex | Age                    | Number (prior to experiment) | Number (after termination) | Littermates (Yes/No) | Other description |
|-----------------------------------------|-----|------------------------|------------------------------|----------------------------|----------------------|-------------------|
| (ApoE <sup>-/-</sup> -Vehicle, Control) | F   | 22 weeks (WD-16 weeks) | 12                           | 8                          | No                   |                   |
| (ApoE <sup>-/-</sup> -12,13-diHOME)     | F   | 22 weeks (WD-16 weeks) | 12                           | 8                          | No                   |                   |

**Sample Size:** Please explain how the sample size was decided. Please provide details of any a *prior* sample size calculation, if done.

The mean *en face* plaque area and complexity of atherosclerosis in ApoE<sup>-/-</sup> mice treated with 12,13-diHOME or exposure at 30°C at 16-20 weeks of age, and fed a Western diet for 12-16 weeks, was 8.5% (standard deviation 4.4%). With a similar variability, a sample size of mice in each group would rely on the 80% power to detect a 50% change with a significance level of 0.05.

### Inclusion Criteria

We have two main reasons for the choosing male mouse models in this study. First is to exclude the complex effects of the estrus cycle and other hormonal changes in female mice, which could potentially affect study results. Moreover, including female mice to study sex differences within our existing mouse models would also be cost- and time-prohibitive, given that our current study design already included 4 different genetically-modified mouse models with their respective controls (namely, ECIRS1 mice with C57BL6 mice, ETBRKO mice with ETBR(fl/fl) mice, eNOSKO mice with C57BL6 mice and VEIRKO mice with VEIRKO(fl/fl) mice), as well as 3 pharmacologically-treated ApoE<sup>-/-</sup> mouse models and their respective controls, including AngII-, L-NAME- and 12,13-diHOME-treated mice.

### Exclusion Criteria

Deaths or impaired behavior activity of mice during experiments were excluded since they have influenced the accuracy and validity of data in metabolic and cardiovascular research.
